# Supplementary material
Source: publisher figshare collection journal article supplement (https://sage.figshare.com/ndownloader/files/12370763)
Supplement: Supplementary file 1 [file 12370763]

**Table A. Summary of the initial modifications to the identity sub-scale of the Stroke IPQ-R**

| <b>Item</b>                           | <b>Change(s)</b>                                                | <b>Rationale</b>                                                                                                                                                                    |
|---------------------------------------|-----------------------------------------------------------------|-------------------------------------------------------------------------------------------------------------------------------------------------------------------------------------|
| Pain                                  | -                                                               | -                                                                                                                                                                                   |
| Difficulty swallowing                 | Added                                                           | Included in Twiddy-version                                                                                                                                                          |
| Sore throat                           | Removed                                                         | Not considered relevant to stroke by Stroke Research Partnership Group                                                                                                              |
| Nausea                                | Removed                                                         | Not considered relevant to stroke by Stroke Research Partnership Group                                                                                                              |
| Breathlessness                        | Removed                                                         | Not considered relevant to stroke by Stroke Research Partnership Group                                                                                                              |
| Weight loss                           | -                                                               | -                                                                                                                                                                                   |
| Fatigue                               | -                                                               | -                                                                                                                                                                                   |
| Tight muscles                         | Added                                                           | Considered relevant to stroke by expert panel                                                                                                                                       |
| Headaches                             | -                                                               | -                                                                                                                                                                                   |
| Bladder problems                      | Added                                                           | Considered relevant to stroke by expert panel                                                                                                                                       |
| Bowel problems                        | Added                                                           | Considered relevant to stroke by expert panel                                                                                                                                       |
| Sore eyes                             | Removed                                                         | Not considered relevant to stroke by Stroke Research Partnership Group                                                                                                              |
| Wheeziness                            | Removed                                                         | Not considered relevant to stroke by Stroke Research Partnership Group                                                                                                              |
| Upset stomach                         | Removed                                                         | Not considered relevant to stroke by Stroke Research Partnership Group                                                                                                              |
| Sleep difficulties                    | -                                                               | -                                                                                                                                                                                   |
| Dizziness                             | -                                                               | -                                                                                                                                                                                   |
| Loss of strength                      | Removed                                                         | Incorporated in 'Paralysis' item                                                                                                                                                    |
| Poor balance                          | Added                                                           | Considered relevant to stroke by expert panel                                                                                                                                       |
| Paralysis                             | Added; wording changed to 'Weakness or paralysis in arm or leg' | Considered relevant to stroke by expert panel; wording subsequently changed to be consistent with Twiddy-version                                                                    |
| Poor vision                           | Added                                                           | Considered relevant to stroke by expert panel                                                                                                                                       |
| Difficulty speaking                   | Added                                                           | Included in Twiddy-version                                                                                                                                                          |
| Forgetfulness                         | Added                                                           | Considered relevant to stroke by expert panel                                                                                                                                       |
| Difficulty writing                    | Added                                                           | Included in Twiddy-version                                                                                                                                                          |
| Emotionality                          | Added; wording changed to 'Crying or laughing inappropriately'  | Considered relevant to stroke by expert panel; wording subsequently changed following feedback from Stroke Research Partnership Group to improve comprehension by stroke survivors. |
| Poor concentration                    | Added                                                           | Considered relevant to stroke by expert panel                                                                                                                                       |
| Difficulty reading                    | Added                                                           | Included in Twiddy-version                                                                                                                                                          |
| What I'm like as a person has changed | Added                                                           | Included in Twiddy-version                                                                                                                                                          |
| Getting upset or weepy                | Added                                                           | Included in Twiddy-version                                                                                                                                                          |
| Clumsiness                            | Added                                                           | Included in Twiddy-version                                                                                                                                                          |
| Hearing difficulties                  | Added                                                           | Considered relevant to stroke by expert panel                                                                                                                                       |
| Difficulty walking or getting around  | Added                                                           | Considered relevant to stroke by expert panel                                                                                                                                       |
| Reduced sensation                     | Added; wording changed to 'Tingling or numbness'                | Considered relevant to stroke by expert panel; wording subsequently changed to be consistent with Twiddy-version                                                                    |
| Stiff joints                          | -                                                               | -                                                                                                                                                                                   |

Symbols and abbreviations: Twiddy-version; Stroke-specific version of the IPQ-R developed by (Twiddy 2008)
